# Supplementary figures and images for: Removal and immobilisation of cobalt ions by a novel, hierarchically structured, diatomite/zeolite Y composite
Source: Royal Society of Chemistry journal article supplement (doi:10.1039/b700048k), 2007-01-01

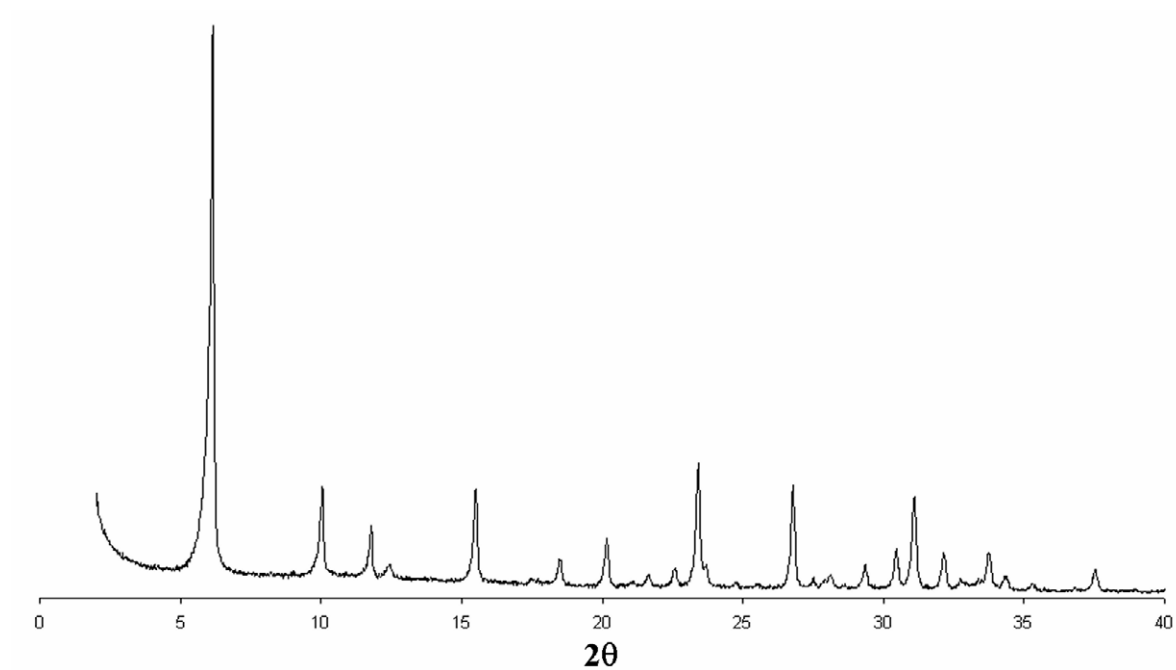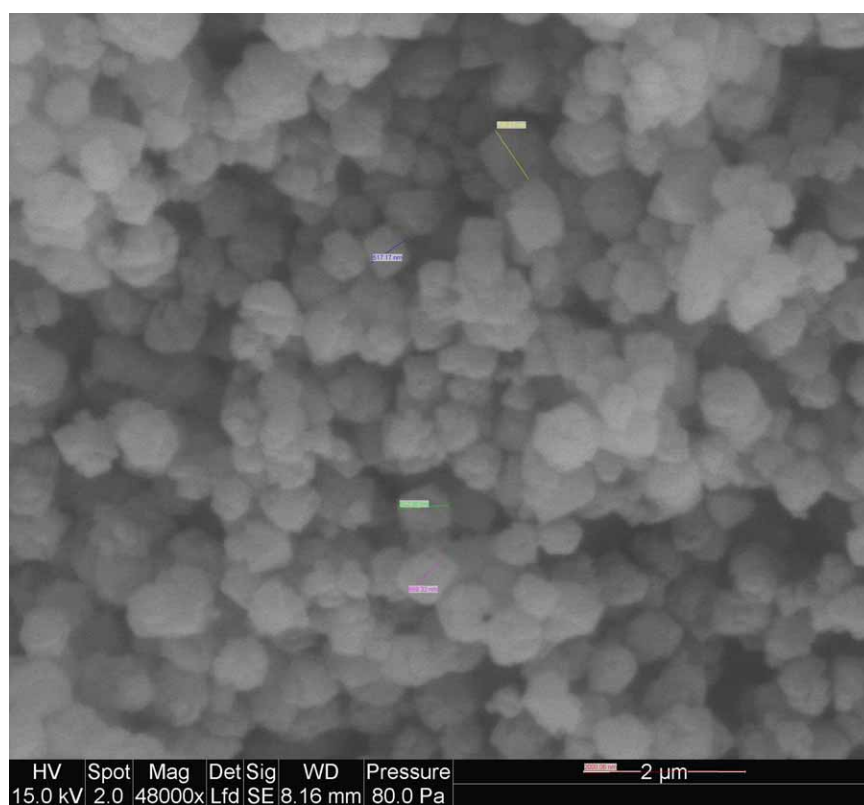

SEM Image of Zeolite Y powder used for comparison.

Supplement: b700048k.pdf [file b700048k.pdf]
